# Supplementary material for: Mapping Drug Physico-Chemical Features to Pathway Activity Reveals Molecular Networks Linked to Toxicity Outcome
Source: PLoS One. 2010 Aug 27;5(8):e12385. doi: 10.1371/journal.pone.0012385 (PMC2929951; doi:10.1371/journal.pone.0012385)
Supplement: Table S1 — Representation of KEGG pathways. This table shows the KEGG pathways represented in this dataset and their relative sizes. (0.05 MB XLS) [file pone.0012385.s017.xls]

## Sheet: Supplementary_Table_1
KEGG ID	KEGG Pathway	Size
rno00190	Oxidative phosphorylation	34
rno04810	Regulation of actin cytoskeleton	93
rno04330	Notch signaling pathway	20
rno04080	Neuroactive ligand-receptor interaction	140
rno04010	MAPK signaling pathway	120
rno00510	N-Glycan biosynthesis	18
rno01030	Glycan structures - biosynthesis 1	40
rno05212	Pancreatic cancer	52
rno00561	Glycerolipid metabolism	21
rno00564	Glycerophospholipid metabolism	26
rno04070	Phosphatidylinositol signaling system	33
rno00330	Arginine and proline metabolism	14
rno02010	ABC transporters - General	13
rno00120	Bile acid biosynthesis	16
rno04060	Cytokine-cytokine receptor interaction	85
rno05216	Thyroid cancer	22
rno04130	SNARE interactions in vesicular transport	24
rno00980	Metabolism of xenobiotics by cytochrome P450	28
rno04610	Complement and coagulation cascades	36
rno05221	Acute myeloid leukemia	36
rno04514	Cell adhesion molecules (CAMs)	55
rno04650	Natural killer cell mediated cytotoxicity	45
rno04670	Leukocyte transendothelial migration	44
rno04120	Ubiquitin mediated proteolysis	66
rno05020	Parkinson's disease	10
rno04350	TGF-beta signaling pathway	63
rno04520	Adherens junction	42
rno04530	Tight junction	57
rno05213	Endometrial cancer	34
rno04360	Axon guidance	50
rno04510	Focal adhesion	104
rno04512	ECM-receptor interaction	42
rno05222	Small cell lung cancer	39
rno04320	Dorso-ventral axis formation	17
rno04662	B cell receptor signaling pathway	31
rno00562	Inositol phosphate metabolism	23
rno04020	Calcium signaling pathway	108
rno04310	Wnt signaling pathway	67
rno04540	Gap junction	58
rno04720	Long-term potentiation	41
rno04730	Long-term depression	46
rno04912	GnRH signaling pathway	47
rno04916	Melanogenesis	44
rno00271	Methionine metabolism	8
rno00450	Selenoamino acid metabolism	6
rno00230	Purine metabolism	65
rno00670	One carbon pool by folate	8
rno05010	Alzheimer's disease	19
rno00071	Fatty acid metabolism	36
rno00592	alpha-Linolenic acid metabolism	6
rno01040	Polyunsaturated fatty acid biosynthesis	15
rno03320	PPAR signaling pathway	55
rno00860	Porphyrin and chlorophyll metabolism	14
rno00010	Glycolysis / Gluconeogenesis	31
rno00260	Glycine, serine and threonine metabolism	27
rno04630	Jak-STAT signaling pathway	61
rno04640	Hematopoietic cell lineage	38
rno00910	Nitrogen metabolism	12
rno00240	Pyrimidine metabolism	25
rno00410	beta-Alanine metabolism	10
rno01430	Cell Communication	45
rno00380	Tryptophan metabolism	18
rno05210	Colorectal cancer	50
rno05220	Chronic myeloid leukemia	48
rno00590	Arachidonic acid metabolism	24
rno00591	Linoleic acid metabolism	13
rno05219	Bladder cancer	30
rno04210	Apoptosis	47
rno04920	Adipocytokine signaling pathway	56
rno01510	Neurodegenerative Diseases	17
rno05030	Amyotrophic lateral sclerosis (ALS)	16
rno00030	Pentose phosphate pathway	15
rno00051	Fructose and mannose metabolism	18
rno00052	Galactose metabolism	13
rno04910	Insulin signaling pathway	80
rno04012	ErbB signaling pathway	51
rno04110	Cell cycle	57
rno05215	Prostate cancer	52
rno04150	mTOR signaling pathway	28
rno04370	VEGF signaling pathway	35
rno04620	Toll-like receptor signaling pathway	44
rno04660	T cell receptor signaling pathway	43
rno04664	Fc epsilon RI signaling pathway	37
rno05211	Renal cell carcinoma	54
rno05214	Glioma	39
rno05218	Melanoma	38
rno05223	Non-small cell lung cancer	34
rno00350	Tyrosine metabolism	21
rno00624	1- and 2-Methylnaphthalene degradation	6
rno00641	3-Chloroacrylic acid degradation	6
rno00650	Butanoate metabolism	18
rno00040	Pentose and glucuronate interconversions	9
rno00150	Androgen and estrogen metabolism	21
rno00500	Starch and sucrose metabolism	17
rno00100	Biosynthesis of steroids	16
rno00900	Terpenoid biosynthesis	6
rno00620	Pyruvate metabolism	25
rno00640	Propanoate metabolism	16
rno05040	Huntington's disease	18
rno05050	Dentatorubropallidoluysian atrophy (DRPLA)	7
rno00521	Streptomycin biosynthesis	7
rno04930	Type II diabetes mellitus	29
rno04950	Maturity onset diabetes of the young	15
rno00360	Phenylalanine metabolism	12
rno00400	Phenylalanine, tyrosine and tryptophan biosynthesis	10
rno00401	Novobiocin biosynthesis	6
rno00950	Alkaloid biosynthesis I	7
rno03010	Ribosome	27
rno05060	Prion disease	8
rno00920	Sulfur metabolism	7
rno00020	Citrate cycle (TCA cycle)	14
rno00251	Glutamate metabolism	17
rno00252	Alanine and aspartate metabolism	18
rno04710	Circadian rhythm	6
rno03030	DNA replication	12
rno00280	Valine, leucine and isoleucine degradation	19
rno00530	Aminosugars metabolism	9
rno00272	Cysteine metabolism	16
rno03020	RNA polymerase	6
rno01031	Glycan structures - biosynthesis 2	17
rno04940	Type I diabetes mellitus	16
rno03050	Proteasome	20
rno04115	p53 signaling pathway	23
rno00970	Aminoacyl-tRNA biosynthesis	11
rno04612	Antigen processing and presentation	23
rno00602	Glycosphingolipid biosynthesis - neo-lactoseries	7
rno04340	Hedgehog signaling pathway	12
rno05217	Basal cell carcinoma	16
rno00361	gamma-Hexachlorocyclohexane degradation	10
rno00740	Riboflavin metabolism	8
rno03022	Basal transcription factors	13
rno00710	Carbon fixation	15
rno00533	Keratan sulfate biosynthesis	7
rno00220	Urea cycle and metabolism of amino groups	8
rno00140	C21-Steroid hormone metabolism	7
rno00480	Glutathione metabolism	22
rno00340	Histidine metabolism	10
rno04740	Olfactory transduction	14
rno00310	Lysine degradation	13
rno00460	Cyanoamino acid metabolism	6
rno00600	Sphingolipid metabolism	9
rno04614	Renin-angiotensin system	10
rno00760	Nicotinate and nicotinamide metabolism	10
rno00532	Chondroitin sulfate biosynthesis	7
rno00960	Alkaloid biosynthesis II	6
rno00565	Ether lipid metabolism	11
rno00062	Fatty acid elongation in mitochondria	6
rno00534	Heparan sulfate biosynthesis	6
